# Supplementary material for: Historical modelling of changes in Lake Erken thermal conditions
Source: Copernicus journal article supplement (doi:10.5194/hess-2019-199), 2019-05-08
Supplement: Supplementary file [file hess-2019-199-AC3-supplement.pdf]

### Authors' response to Referee 3

**Referee (1) – Page 2, lines 5-8.** I do not understand the claim that these studies do not use observations to validate their models. This is simply not true. Stefan et al., 1998, include a section called model adequacy tests; Taner et al., 2011, state that they use a previously calibrated model (validation results not shown); and Winslow et al., 2017, include a section called technical validation. Indeed it would be extremely bad practice to parameterize a model without calibration-validation. Please make your intentions and motivations for the study here much clearer. This would also be improved by expanding the current introduction. At present there are only two paragraphs which cover very little literature. There is a need to root this work within the wider research.

**Authors' response (1) – Page 2, lines 5-8.** This is bad wording on our part. We did not mean to imply that the mentioned studies did not validate their models. What we were trying to say was that these studies have focused on simulating future changes in lake thermal structure (with model validation to present conditions) while in this paper we are advocating for running simulations farther back in time than is normally done for validation purposes in order to provide evidence that climate change has already affected lake thermal structure. We propose to expand our introduction by referencing to papers that have investigated historical record changes in lake water temperature (e.g. Kainz et al. 2017, Livingstone et al. 2001).

**Referee (2) – Page 4, lines 1-22.** How much data is actually missing from the dataset for each parameter? A table, or similar, detailing the quantity and quality of the data would be extremely helpful.

Why are the additional sites only considered when there is missing data? Are the limited stations used truly representative of conditions across the entire lake? Would the coverage and overall consistency of the observed data not be improved if the same data was used at all times? Please clearly justify your decision-making here - deliberately excluding valid data is problematic. Similarly, please indicate the locations of the additional stations on your map. It would be useful if the reader could understand the locations of these additional stations relative to the three detailed.

**Authors' response (2) – Page 4, lines 1-22.** A detailed description of the number of missing data is available in the supplementary material (tables 1-4). We put these tables in the supplementary material for a better readability of the paper. However, we are considering to add a single summary table in the paper.

Our meteorological data is either collected from a small island (A fig1) in the lake or from a meteorological station only a few hundred meters from the lake shore (B fig 1). Given the station locations, we considered this ideal data for forcing a lake model and it was our assumption that these data should be used when available. When data were missing, we found that the neural network models made use of as many of the surrounding data sources as possible providing the most accurate replacement values. We do not believe that we were excluding valid data, based on our belief (and we suspect a widely held belief) that locally collected data would be most appropriate for modeling. Data from additional sites was only used as a substitute when the most valid data were not available.

We are also considering adding a map with the meteorological station we used in our study.

**Referee (3) – Page 5, lines 13-15; 21-24.** The authors appear to use the same data for calibration-validation. Why is this? Please justify - the standard is to employ a split-sampling approach. Further, the aim is to minimize the variance in the GOF statistics across the calibration-validation period. Without defined periods, you cannot determine the consistency of the model performance.

L21 - What is meant by best? Was the algorithm run multiple times? How is the best one determined when three GOF statistics are used? Please clarify.

You introduce figures 2-4 but provide no further commentary on these. There is no clear discussion with regards to how this indicates good performance. Indeed, you do not refer to your GOF statistics through these figures at all. The reporting of the model performance needs to be significantly expanded. Please also consider reporting model performance per month and/or season - this may help to give insights into whether the model performs worse immediately following the ice-cover period.

Please also note that Figures 3 and 4 do not actually add anything to the reporting of model performance - they give no indication of the GOF of the model. Additionally, the use of inconsistent x-y scales is bad practice and misleading. If producing the figures in R then it is possible to fix the axes across plots/facets.

As a more minor comment - it is not necessary to define the three equations, they are standard mathematical equations. What is more important is to explain why these are relevant - what insight does using these GOF statistics provide?

**Authors' response (3) – Page 5, lines 13-15; 21-24.** We agree that for typical applications of models where the goal is to make simulations to future or otherwise different conditions than are covered by the record of measured calibration data it is appropriate to employ a split calibration and validation strategy. However in our case the goal was not to simulate outside of the period of available calibration data, but to use the model to provide a complete and consistent record over a period in which calibration data were available but incomplete (especially in the earlier part of the record). In such a case we believe it is better to make full use of all measured calibration data rather than removing some for a separate validation run. This should ensure that the calibration encompasses the widest possible range of variability and provides parameter values that are most appropriate for the entire period simulated in our study.

L21 - In the ACPy calibration the best set of parameter is calculated by minimizing the log likelihood function.

The caption of figures 2-4 will be expanded and there will be a reference to the model performance which are currently described in table 1 (page 18). The use of inconsistent x-y scales on fig. 3-4 will be fixed in the revised paper. We propose two solutions: the first one is to make the x-axis of the same length in each panel (the same number of years will be shown). Alternatively, we could show the comparison between observed and modelled water temperature of some representative years. The standard mathematical equations will be removed in the revised paper.

**Referee (4) – Page 5, lines 26-28.** Please consider expanding on the limitation of ice-cover - perhaps in the discussion? For example, it would be helpful to suggest how this might be addressed, being unable to account for almost six months of the year is problematic. Similarly, this should be acknowledged in the section where you describe GOTM. For instance, why do you not simply use a model that does include an ice-cover module given the length of time the lake is ice-covered?

**Authors' response (4) – Page 5, lines 26-28.** The GOTM model used for the simulations documented here did not have a functioning ice model, but instead cut off surface heat exchange when the

simulated surface water temperature became negative. This provided a very simple way to make continuous simulations that include freezing conditions that would normally lead to the formation of ice. However, the temperature profiles during winter were not realistic, and could not be used for model calibration. This can be seen in figures 1-2 (below) where a comparison between simulated and observed water temperature at 1m and 15 m depth is reported for year 2009. At 1 m depth, simulated and observed temperature are rather similar throughout the entire year. However, at 15 m depth, the model does not take into account the heat loss from sediment during ice-cover, which cause an increase in bottom water temperature. During winter, there is a clear mismatch between simulated and observed water temperature. For this reason, all data collected between 1 December - 31 March are excluded from the temperature data used for model calibration and only data between 1 April - 30 November are used for calibrating the model. .

Moreover, the reason why we used GOTM model is that this paper is the result of a spin-off study within the PROGNOS project (<http://prognoswater.org/>) which uses this model to provide real-time predictions of water quality using short-term weather forecast data. In this study, the GOTM model was tested for Lake Erken which is part of PROGNOS. This model has the advantage that it can be coupled to biogeochemical models, which is crucial for the aims of PROGNOS.

We will follow your valuable suggestion to expand the limitation of the ice-cover in our discussion.

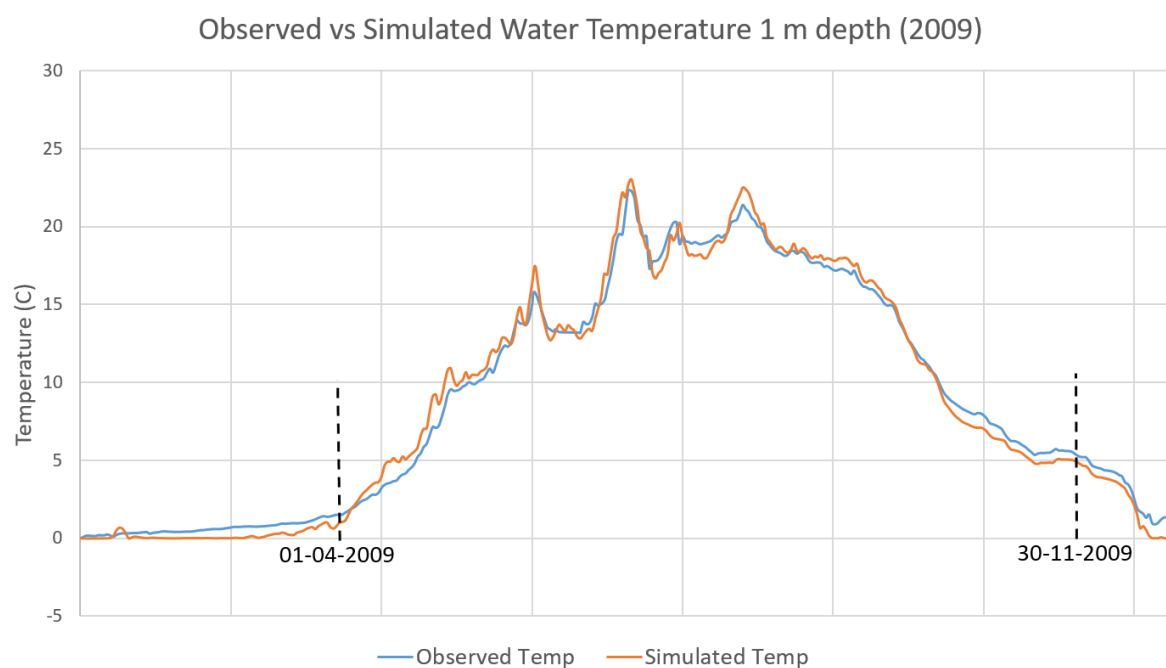

**Figure 1**

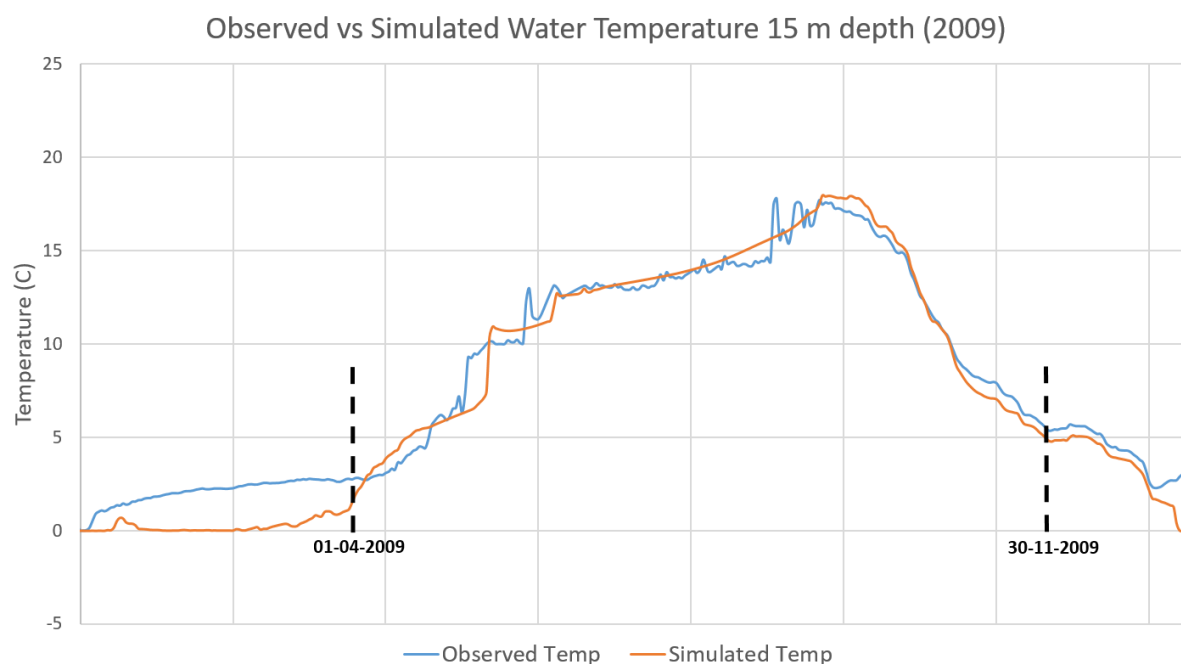

**Figure 2**

**Referee (5) – Page 9, figure 5.** Again, please use consistent y-axes and begin at zero. This is bad practice and misleading. Limit the x-axis to the start and end-year.

A continuous line should not be used to represent point data (single seasons per year). This data should be represented as points, or as a single continuous line containing all months.

Finally, please add space between the figures and their titles - at present it looks like the plot titles are related to the dashed line. Including the dashed and solid line in the legend would help. Three duplicated legends are not necessary, replace with a single legend.

**Authors' response (5) – Page 9, figure 5.** We will improve the readability and consistency of the plots following your suggestions.

**Referee (6) – Page 2, line 9.** Define what is meant by a long record, for hydrological modelling of rivers this would mean > 30 years, for hydroecology > 15 years is considered long.

**Authors' response (6) – Page 2, line 9.** From our point of view the definition of long record is somewhat arbitrary. We think that a long record should encompass the historical changes in climate that have already occurred. For example, a record of 50 years of data can be considered long.

**Referee (7) – Page 1, line 6.** Need to explain what the abbreviation is - for example, consider: "General Ocean Turbulence model (GOTM), a hydrodynamic model configured in Lake Mode".

**Authors' response (7) – Page 1, line 6.** Thank you for the suggestion. This will be added in the abstract.

**Referee (8) – Page 2, lines 10-11.** Please provide a citation if making a claim such as this.

**Authors' response (8) – Page 2, lines 10-11.** This is based on the experience of one author (Don Piesrond) who has worked for public water utilities and found that effects of climate change that have already occurred support policies that mitigate future expected changes. To our knowledge, no reference is available.

**Referee (9) – Page 2, line 17.** What does significant mean? How much? Can you give a percentage or some other kind of numerical indication?

**Authors' response (9) – Page 2, line 17.** The word "significant" will be changed to "large". Moreover, we are considering adding a table with the number of available daily water temperature data for Lake Erken and number of missing data in the interval 1961-2017.

**Referee (10) – Pages 2-3, lines 29-30; 1-2.** Extremely limited detail on why the lake was considered. Why should the reader care about the results from this particular work? What is interesting about it? More information on the case study would also be useful. For example, an overview of the average climate, seasonality, the ecology of the area and anthropogenic influences.

**Authors' response (10) – Pages 2-3, lines 29-30; 1-2.** Lake Erken has been extensively studied in the last 70 years and it has a considerable amount of water temperature data available, which made it a good study case for testing the methodological approach of this paper. Moreover, we think that this paper is addressed to describe a valid methodology that aim to reconstruct past water temperature of lakes and not to the ecological importance of Lake Erken in itself. We will consider providing more information on the investigated lake during the paper revision.

**Referee (11) – Page 3, line 2.** What months represent winter? The reader cannot tell how many months the lake is actually ice-covered. Also, please clarify if it is the entirety of the lake which is ice-covered.

**Authors' response (11) – Page 3, line 2.** In this paper, we considered the period of Dec-Mar as winter, when the lake is ice-covered. However, in some years, the onset of ice-cover starts in January and it ends in April. Yes, the lake is ice-covered in its entirety. This information will be added in the revised paper.

**Referee (12) – Page 3, lines 9-12.** Repetitive - could simplify to say: "The model utilises six of these climatic parameters (excluding DP) at an hourly timestep; DP is input on a daily timestep."

**Authors' response (12) – Page 3, lines 9-12.** Thank you for the suggestion. This will be modified in the revised paper.

**Referee (13) – Page 3, lines 4-13.** More information is required for GOTM. Why choose this model specifically? Why is it well-suited for this application? Please also describe the structure of the model,

what key processes does it capture? Define and describe the parameters of the model (Table 1).  
What are the limitations of the model?  
It is also worth stating that GOTM, and all the other software/codes used, are Open Source.

**Authors' response (13) – Page 3, lines 4-13.** GOTM is mainly used as a stand-alone model for hydrodynamic applications in natural water, such as surface heat fluxes, surface mixed-layer dynamics and stratification processes.

The adjusted model parameters in this study are heat-flux, shortwave radiation and wind factors which are non-dimensional scaling factor that are adjusted to minimize the difference between observed and modelled temperature. The minimum turbulent kinetic energy ( $k_{min}$ ) and the e-folding depth for visible fraction ( $g_2$ ) are parameters that strongly influence the vertical distribution of light and temperature in the water column. Low values of  $g_2$  represent a higher extinction coefficient promoting higher surface temperature.

A known limitation of the model is the lack of an ice-module and a complete energy balance of the ice including ice growth and ice decay is not calculated by GOTM at this time.

We will state that GOTM is an OpenSource model in the revised paper.

**Referee (14) – Page 3, figure 1.** I am aware that the images used for review are not the final high-resolution images. However, this map looks equivalent to a screenshot. A north arrow and, critically, a scale bar, are missing. Additionally, labelling of features such as the roads and the island are unnecessary. Please consider producing a map using GIS Or similar software (mapping options are available in R). A map of Sweden indicating the location of the lake, which would highlight the relative scale, are also necessary.

**Authors' response (14) – Page 3, figure 1.** This is a very good point. Yes, we are aware that the map in the discussion paper is not ideal. We will improve this map in the revised paper.

**Referee (15) – Pages 3-4, lines 15-17; 1-3.** Inconsistent use of meteorological station and weather station - please be consistent. For conciseness, the authors could simply state: "Driving climatic parameters were retrieved from meteorological stations at..."

**Authors' response (15) – Pages 3-4, lines 15-17; 1-3.** Thanks for the suggestion. The naming will be made consistent in the revised paper.

**Referee (16) – Pages 3-4, lines 15-17; 1-3.** Clearer signposting is required, please refer to the letters that each station represents in the main body text.

**Authors' response (16) – Pages 3-4, lines 15-17; 1-3.** This will be corrected in the revised paper.

**Referee (17) – Page 3, line 15.** Primarily retrieved from? What does primarily mean specifically?

**Authors' response (17) – Page 3, line 15.** We propose to modify the sentence as follows: "Driving meteorological parameter were retrieved whenever possible from the Erken laboratory meteorological station..."

**Referee (18) – Page 1, line 9.** Real is not very clear - consider replacing with "observed" (or similar).

**Authors' response (18) – Page 1, line 9.** Thanks for the suggestion. This will be corrected in the revised paper.

**Referee (19) – Page 3, line 16.** Is the Malma weather station the Erken laboratory meteorological station? This inconsistency is reflected in the caption as well.

**Authors' response (19) – Page 3, line 16.** Yes, it is. This will be better clarified in the revised paper.

**Referee (20) – Page 4, lines 10; 21.** What is meant by best? Please clarify how this is judged.

**Authors' response (20) – Page 4, lines 10; 21.** We propose to remove lines 8-14 (page 4) and re-write them as follows: "To made maximum use of data from surrounding station we used Artificial Neural Network function fitting analysis (ANN nftool) to predict missing meteorological data at Erken. The analysis was carried out using MATLAB version R2017b (MathWorks Inc. Natick, Massachussets)". We propose to modify lines 20-21 (page 4) into: "Offsite and local dataset overlap for at least 8-10 years to get a reasonable number of data to perform ANN function fitting analysis that describes input-target relationship."

**Referee (21) – Page 4, lines 24-25.** Is the lake always ice-free April-November? Additionally, please replace was with "is" - I presume that the ice-free period has not recently changed, therefore this should be in the present-tense.

**Authors' response (21) – Page 4, lines 24-25.** This period is usually longer than the total period of ice cover which can be variable from year to year. There are occasions when ice continues into end of April, but the mid-April to November period is definitely representative of ice free conditions and using data from this period to calibrate the model will definitely avoid errors associated with GOTM's simplistic simulation of ice cover. During the revision of the manuscript we noticed we noticed that water temperature data of April and November were not considered to calibrate the model. We re-run the model including April and November water temperature and we updated the calibration parameters. The new calibration provided very similar results to the calibration showed in the discussion paper. These are the values of the updated calibrated parameters and model statistics

- Heat-flux factor: 0.863009
- Short- wave radiation factor: 0.970753
- Wind factor: 1.28701
- Minimum turbulent kinetic energy: 1.64873e-06
- e-folding depth for visible fraction: 2.63732
  
- ln Likelihood: -60469.715
- Bias (°C): -0.04707
- MAE (°C): 0.7529
- RMSE (°C): 1.089
- Correlation: 0.9717

Table 1 will be updated with these new values in the revised paper.  
The sentence will be corrected with the present- tense.

**Referee (22) – Page 4, lines 24-32.** Why is this text part of model calibration? This is still text relating to the input data. Perhaps consider combining 2.3 Data sources of driving parameters-2.3 Model calibration (paragraph 1) into a single Data section.

Additionally, there is an issue with the section numbering: 2.3-2.4-2.3

**Authors' response (22) – Page 4, lines 24-32.** We are considering to rename the section "2.3 Data sources of driving parameters"(page 3, line 14) into "2.3 Data sources of meteorological parameters" and rename the section "2.3 Model calibration" (page 4, line 23) into "2.5 Observed water temperature data and model calibration".

We will correct the section numbering in the revised paper.

**Referee (23) – Page 5, lines 1-2.** As with the hydrodynamic model, the reader needs to know why this approach is used. What is the rationale?

**Authors' response (23) – Page 5, lines 1-2.** We propose to add the following sentence in the text: "ACPy is a utility that eliminates the need for time consuming manual calibration of hydrodynamic and water quality models. This allows for more extensive testing and evaluation of model calibrations, ultimately providing more accurate and repeatable results".

**Referee (24) – Page 5, lines 5-7.** These lines are unclear, please consider rewording.

**Authors' response (24) – Page 5, lines 5-7.** We propose to modify lines 5-7 as follows: "Simulations were run between 1961 and 2017 but in order to obtain stable initial conditions the model was run for an additional one year spin up using a copy of the 1961 data. In this way, 1961 data were both used as spin-up year and discarded from calibration and then reused in the proceeding calibration."

**Referee (25) – Page 5, lines 8-13.** The authors state that an algorithm is used in the parameterisation. What is the stopping criteria? How does the algorithm select a parameter set?

**Authors' response (25) – Page 5, lines 8-13.** ACPy was set to run 10000 simulation during calibration to get a stable solution to obtain the optimal parameter set that minimizes the log likelihood function.

**Referee (26) – Pages 5-6, lines 28; 1-3.** Please explain to the reader why they should care about these metrics - why are they important? What do they indicate?

**Authors' response (26) – Pages 5-6, lines 28; 1-3.** We propose to rephrase lines 26-27 (page5) as follows: "We summarized the model temperature output by calculating a number of statistics that can qualify the ecological consequence of changes in thermal stratification using Lake Analyzer R



Package. The ecological implications of the changes of these metrics due to climate change are discussed in detail in the Discussion section.

**Referee (27) – Page 6, line 12.** Did you test for autocorrelation? Was it all autocorrelated? Please be clearer.

**Authors' response (27) – Page 6, line 12.** Yes, we tested for autocorrelation using acf and pacf function in R. The modified Mann-Kendall test was used for detecting monotonic increase of stratification length and termination and growing season.

**Referee (28) – Page 6, lines 13-14.** Please correct Figure 3 accordingly - the time-series should not extend beyond the point for which it is useful!

**Authors' response (28) – Page 6, lines 13-14.** Thanks for the suggestion. This can be improved in the revised paper.

**Referee (29) – Page 1, lines 10-12.** Suggest the author's state why the results are split into these sub-intervals; until very late on the paper I presume the split was because pre-1988 records were patchy.

**Authors' response (29) – Page 1, lines 10-12.** Thanks for the suggestion. We will add a sentence in the abstract that specifies that the splitting was selected because of an abrupt change in air temperature.

**Referee (30) – Page 6, line 21.** Please consider moving this line to the start of the section. Please also include the package version for Lake Analyzer (the citation seems relatively old).

**Authors' response (30) – Page 6, line 21.** The line will be moved at the beginning of the section. The package version used here is 1.11.4 and the citation will be modified as with the following: "Winslow, L., Read, J., Woolway, R., Brentrup, J., Leach, T., Zwart, J., Albers, S., and Collinge, D: rLakeAnalyzer: Lake Physics Tools. R package version 1.11.4. <https://CRAN.R-project.org/package=rLakeAnalyzer>, 2018."

**Referee (31) – Page 9, line 2.** What data did this use? The pre-1988 data which included data from mixed stations and the post-1988 data which was much more consistent? Can this finding be trusted?

**Authors' response (31) – Page 9, line 2.** Yes, pre-1988 data mostly included data from mixed station. However, these data have been adjusted to better represent Lake Erken local conditions (at Malma met station) using Neural Network function fitting analysis. This analysis report a very good agreement between Erken air temperature (target data) and output data (see supplementary material). Given that, we think that we think that air temperature dataset used in this study is reliable.

**Referee (32) – Page 9, line 2.** In the discussion, please explain to the reader why this matters, what it indicates etc. - It is not made clear.

**Authors' response (32) – Page 9, line 2.** From our point of view, an abrupt change in air temperature support the fact that a more rapid change in water temperature is occurring in the last decades and that the effect of climate change on thermal conditions is accelerating.

**Referee (33) – Page 9, line 5.** Please define your terms, e.g. epilimnetic.

**Authors' response (33) – Page 9, line 5.** We will consider to define the terms in the revised paper.

**Referee (34) – Page 9, lines 9-14.** Please be consistent in the number of significant figures for temperature.

**Authors' response (34) – Page 9, lines 9-14.** Thanks for the suggestion. This will be corrected in the revised paper.

**Referee (35) – Page 9, line 14.** Please start a new paragraph before discussing thermal stratification.

**Authors' response (35) – Page 9, line 14.** Thanks for the suggestion. This will be corrected in the revised paper.

**Referee (36) – Pages 9-10.** As a decadal mean, it would be useful to see the reporting of confidence intervals for these values. Perhaps consider a table of results.

**Authors' response (36) – Pages 9-10.** Thanks for your suggestion. We will consider to add a table of result in the revised paper.

**Referee (37) – Page 11, lines 1-8.** You cannot claim that there was a good match. No valid assessment of model performance was provided. This needs to be significantly addressed before such a claim can be asserted.

**Authors' response (37) – Page 11, lines 1-8.** In the revised paper we will refer to the table and figures where the model performance is reported.

**Referee (38) – Page 11, line 12.** I do not agree that it indicates the reliability, the wording is too strong. It could be described as a positive indication.

**Authors' response (38) – Page 11, line 12.** We propose to change the word "reliability" into "consistency".

**Referee (39) – Page 12, lines 1-11.** Much of this text appears to be results.

**Authors' response (39) – Page 12, lines 1-11.** From our point of view, reporting again the major results in the discussion section and provide a possible explanation for them would be easier to follow/understand for the reader and would improve the readability of the paper.

**Referee (40) – Page 1, lines 10-11; 15-16.** State the months associated with your seasons.

**Authors' response (40) – Page 1, lines 10-11; 15-16.** Thanks for your suggestion. The months will be added in the revised paper.

**Referee (41) – Page 12, lines 14-17.** The provision of a confidence interval would help to expand upon this further (it could also improve or worsen the difference in results).

**Authors' response (41) – Page 12, lines 14-17.** A confidence interval is not reported by O'Reilly et al. (2015), but only the Sen's slope of lake summer water temperature trends.

**Referee (42) – Page 12, lines 18-22.** Does O'Reilly account for the influence of ice-cover? If yes, could this not also account for some of the discrepancy? Please weight the pros and cons of this study versus theirs accordingly.

**Authors' response (42) – Page 12, lines 18-22.** Trends reported by O'Reilly et al. do not account for ice-cover since the work reports lake surface summer temperature trends. However, the paper does state that lakes that are always completely ice-covered during winter (this is the case of Lake Erken) are experiencing a faster warming trend compared to lakes that do not freeze during winter.

**Referee (43) – Page 13, lines 25-34.** Suggest that the authors consider leading the discussion with this text. At present, it is not clear to the reader why this work or the results is relevant - the implications are not made clear.

**Authors' response (43) – Page 13, lines 25-34.** We consider that the first part of the discussion is useful to demonstrate the validity of the first aim of this work that is to provide a valuable and reliable method to extend historical water temperature records back in time. In the second part (lines 25-34 page 13 and lines 1-7 page 14) we provided the most important ecological implications that a warmer climate might have on lake Erken specifically. This order follows the same order of how the aims are described in the introduction.

**Referee (44) – Page 14, lines 8-12.** The assertion of "accurately" cannot be made whilst there is no robust consideration of model performance.

**Authors' response (44) – Page 14, lines 8-12.** We propose to rephrase lines 8-9 (page 14) in the following way: "The present study has shown that the use of the GOTM model to reconstruct the past 57-years of thermal condition of Lake Erken was a valuable too for detecting changes in its thermal structure. This methodology presented here can be extended to other lakes that have a

record of water temperature data. The use of local meteorological data can be used to model water temperature record further back in time or fill data gaps in water temperature records."

**Referee (45) – Page 14, lines 13-19.** Suggest that a dedicated conclusion would help to wrap up the paper and reassert the aims/objectives and relevance of the work.

**Authors' response (45) – Page 14, lines 13-19.** Thanks for the suggestion. These lines will be moved into a dedicated conclusion in the revised paper.

**Referee (46) – Page 1, lines 23-25.** Abstract does not necessarily make clear why this matters - what is the need for the work?

**Authors' response (46) – Page 1, lines 23-25.** We propose to remove line 5 (page 1) and write as follows: "Historical lake water temperature records are a valuable source of information to assess the influence of climate change on lake thermal structure. However, in most cases such records span a short period of time and/or are incomplete, providing a less credible assessment of changes in lake water temperature."

**Referee (47) – Page 1, lines 27-29.** This first sentence is repetitive; also not convinced that Samal et al., 2012 is the best citation for this critical statement. There are other more relevant seminal works that the authors may cite.

**Authors' response (47) – Page 1, lines 27-29.** We propose to re-phrase lines 27-29 as follows: "Changes in the thermal structure and mixing regimes of lakes are a consequence of changes in several climatic factors such as air temperature, solar radiation, cloud cover, wind speed and humidity (Woolway et al.2019)."

**Referee (48) – Page 2, lines 1-2.** Again, repetition - it is self-evident that a rise in lake water temperature increases water temperature - please be more concise.

**Authors' response (48) – Page 2, lines 1-2.** Thanks for your suggestion. The citation of Arhonditsis et al. can be removed for conciseness.

**Referee (49) – Page 2, lines 5-7.** It would be helpful to explain what some of the conclusions of these studies are/were - it makes it clearer to the reader why there is a need for this.

**Authors' response (49) – Page 2, lines 5-7.** Thanks for your suggestion. We will consider to expand this part of introduction in the revised paper.

**Referee (50) – Page 6, lines 4-7.** I would like to highlight that the level of description here is excellent and represents the level that should be achieved throughout the manuscript.

**Authors' response (50) – Page 6, lines 4-7.** Thanks for your comment!
